# Supplementary material for: Role of extracted phytochemicals from Rosa sterilis S. D. Shi in DSS-induced colitis mice: potential amelioration of UC
Source: Royal Society of Chemistry journal article supplement (doi:10.1039/d3fo02456c), 2023-01-01
Supplement: d3fo02456c1.pdf [file d3fo02456c1.pdf]

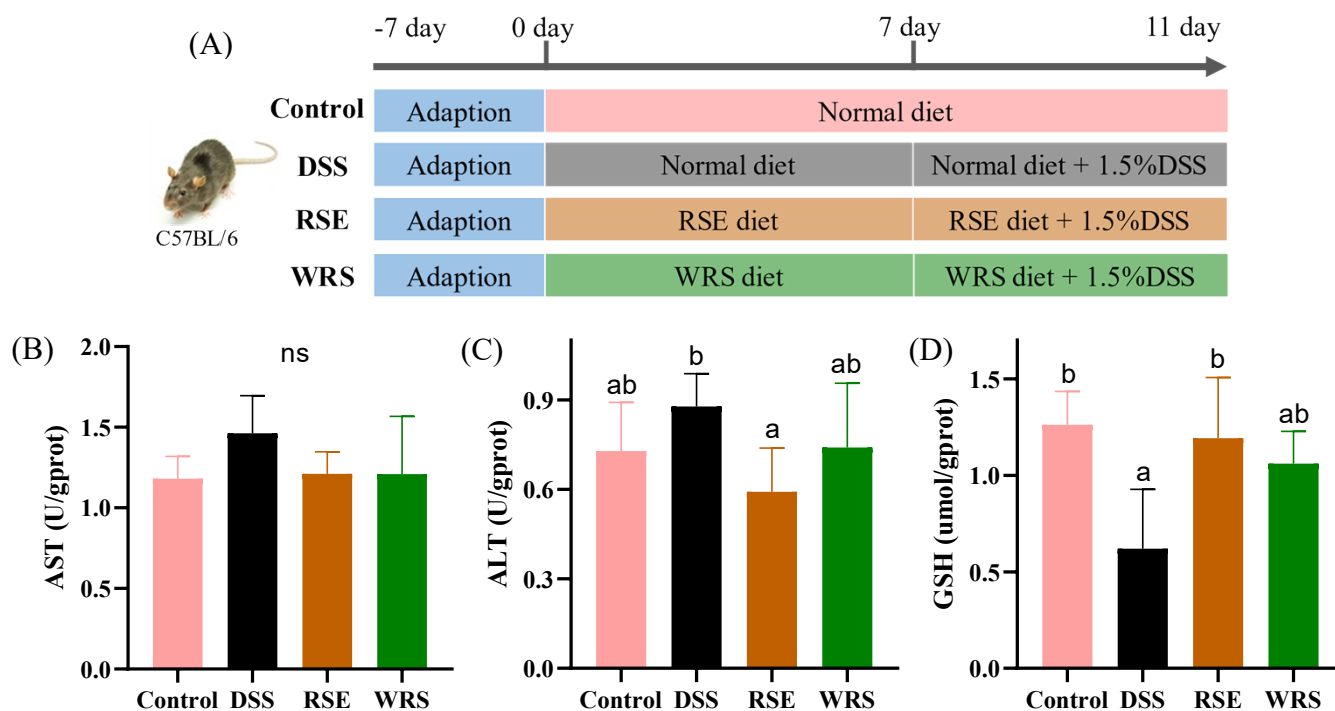

**Figure S1** Animal experiment design(A); levels of AST(B), ALT(C) and GSH (D) in liver tissue of mice. Data are expressed as mean  $\pm$  SD (n = 10). Different lowercase alphabet letters (a–c) are significantly different at the level of  $p < 0.05$ . RSE: *R. sterilis* S. D. Shi ethanol extract; WRS: whole *R. sterilis* S. D. Shi fruits.

**Table S1** The standard curves of gallic acid, rutin and Trolox

|             | Standard curve           | R <sup>2</sup> |
|-------------|--------------------------|----------------|
| Gallic acid | $y = 0.3746 x + 0.3483$  | 0.9964         |
| Rutin       | $y = 0.9432 x + 0.0391$  | 0.9967         |
| DPPH        | $y = -1.1076 x + 2.3831$ | 0.9994         |
| ABTS        | $y = -1.0209 x + 1.4674$ | 0.9993         |
| FRAP        | $y = 0.5295 x + 0.0986$  | 0.9995         |

**Table S2A** AIN93G diet formula

| Ingredients         | Content (%) |
|---------------------|-------------|
| Casein, 30mesh      | 20.00       |
| L-cystine           | 0.3         |
| Corn starch         | 39.70       |
| Maltodextrin        | 13.20       |
| Sucrose             | 10.00       |
| Cellulose           | 5.00        |
| Soybean oil         | 7.00        |
| T-butylhydroquinone | 0.0014      |
| Mineral mix s10022G | 3.50        |
| Vitamin mix V10037  | 1.00        |
| Choline bitartrate  | 0.25        |

**Table S2B** Characterization of WRS

| Components           | Characterization   |
|----------------------|--------------------|
| Total phenols        | 155.37 mg/100 g FW |
| Total flavonoids     | 278.63 mg/100 g FW |
| β-carotene           | 780.89 μg/100 g FW |
| Zeaxanthin           | 268.78 μg/100 g FW |
| Ascorbic acid        | 1.19 g/100 g FW    |
| Malic acid           | 0.26 g/100 g FW    |
| Tartaric acid        | 0.26 g/100 g FW    |
| Glucose              | 10.32 g/100 g FW   |
| Arabinose            | 3.61 g/100 g FW    |
| Galactose            | 1.60 g/100 g FW    |
| Superoxide dismutase | 4,609.26 U/g       |
| Total soluble solids | 16.55 °Brix        |

**Table S3** Scoring criteria for DAI

| Score | Weight loss (%) | Stool consistency   | Bleeding                 |
|-------|-----------------|---------------------|--------------------------|
| 0     | <1              | Normal              | None                     |
| 1     | 1~5             | Soft stools         | Presence of blood        |
| 2     | 5~10            | Soft and wet stools | Moderate bleeding        |
| 3     | 10~20           | Mild diarrhoea      | Moderately high bleeding |
| 4     | >20             | Diarrhoea           | Abundant bleeding        |

**Table S4** Scoring criteria for colon histological damage

| Feature graded        | Description                             | Grade |
|-----------------------|-----------------------------------------|-------|
| Crypt damage          | None                                    | 0     |
|                       | Basal 1/3 damaged                       | 1     |
|                       | Basal 2/3 damaged                       | 2     |
|                       | Only surface epithelium intact          | 3     |
|                       | Entire crypt and epithelium lost        | 4     |
| Goblet cell depletion | None                                    | 0     |
|                       | Slight crypt damage                     | 1     |
|                       | Moderate crypt damage                   | 2     |
|                       | Severe crypt damage                     | 3     |
| Inflammation          | None                                    | 0     |
|                       | Mild inflammatory infiltration          | 1     |
|                       | Moderate inflammatory infiltration      | 2     |
|                       | Large amount of inflammatory infiltrate | 3     |

**Table S5** Primer sequence for RT-qPCR

| Primer direction (5'~3') |   | Sequence                  |
|--------------------------|---|---------------------------|
| $\beta$ -actin           | F | CATCCGTAAAGACCTCTATGCCAAC |
| $\beta$ -actin           | R | ATGGAGCCACCGATCCACA       |
| MUC2                     | F | TCCTGACCAAGAGCGAACAC      |
| MUC2                     | R | ACAGCACGACAGTCTTCAGG      |
| TNF- $\alpha$            | F | GCCTCTTCTCATTCCTGCTT      |
| TNF- $\alpha$            | R | TGGGAACTTCTCATCCCTTTG     |
| IL-1 $\beta$             | F | TGGCAACTGTTCCCTG          |
| IL-1 $\beta$             | R | GGAAGCAGCCCTTCATCTTT      |
| IL-6                     | F | CCCACCAAGAACGATAGTCA      |
| IL-6                     | R | GGTATCCTCTGTGAAGTCCTC     |
| COX-2                    | F | AAGAGGCTAAGACCGCCTTC      |
| COX-2                    | R | GTCGTGGTCAGTCAACATGG      |
| iNOS                     | F | AGGTACTCAGCGTGCTCCAC      |
| iNOS                     | R | GCACCGAAGATATCTTCATG      |

**Table S6** The standard curves of SCFAs

|                 | RT (min) | Standard curve | R <sup>2</sup> |
|-----------------|----------|----------------|----------------|
| Acetic acid     | 8.872    | y = 41.56 x    | 0.9977         |
| Propionic acid  | 10.596   | y= 87.41 x     | 0.9977         |
| Isobutyric acid | 11.168   | y = 126.00 x   | 0.9977         |
| Butyric acid    | 12.458   | y= 119.85 x    | 0.9978         |
| Isovaleric acid | 13.311   | y= 157.93 x    | 0.9980         |
| Valeric acid    | 14.757   | y= 153.18 x    | 0.9981         |
